# Supplementary material for: Systems biology of electrogenic Pseudomonas putida - multi-omics insights and metabolic engineering for enhanced 2-ketogluconate production
Source: PubMed Central journal article supplement (PMC11389600; doi:10.1186/s12934-024-02509-8), 2024-09-11
Supplement: 12934_2024_2509_MOESM1_ESM.pdf [file 12934_2024_2509_MOESM1_ESM.pdf]

**Additional file 1 to**

**Systems biology of electrogenic *Pseudomonas putida* - multi-omics insights and metabolic engineering for enhanced 2-ketogluconate production**

Anna Weimer<sup>1</sup>, Laura Pause<sup>2</sup>, Fabian Ries<sup>1</sup>, Michael Kohlstedt<sup>1</sup>, Lorenz Adrian<sup>3</sup>, Jens Krömer<sup>2</sup>, Bin Lai<sup>4</sup>, and Christoph Wittmann<sup>1#</sup>

<sup>1</sup> Institute of Systems Biotechnology, Saarland University, Saarbrücken, Germany

<sup>2</sup> Systems Biotechnology Group, Helmholtz Centre for Environmental Research - UFZ, Leipzig, Germany

<sup>3</sup> Department of Molecular Environmental Biotechnology, Helmholtz Centre for Environmental Research – UFZ, Leipzig, Germany

<sup>4</sup> BMBF Junior Research Group Biophotovoltaics, Helmholtz Centre for Environmental Research - UFZ, Leipzig, Germany

#Phone/FAX: +49 681 302 71970/71972, e-mail: [christoph.wittmann@uni-saarland.de](mailto:christoph.wittmann@uni-saarland.de)

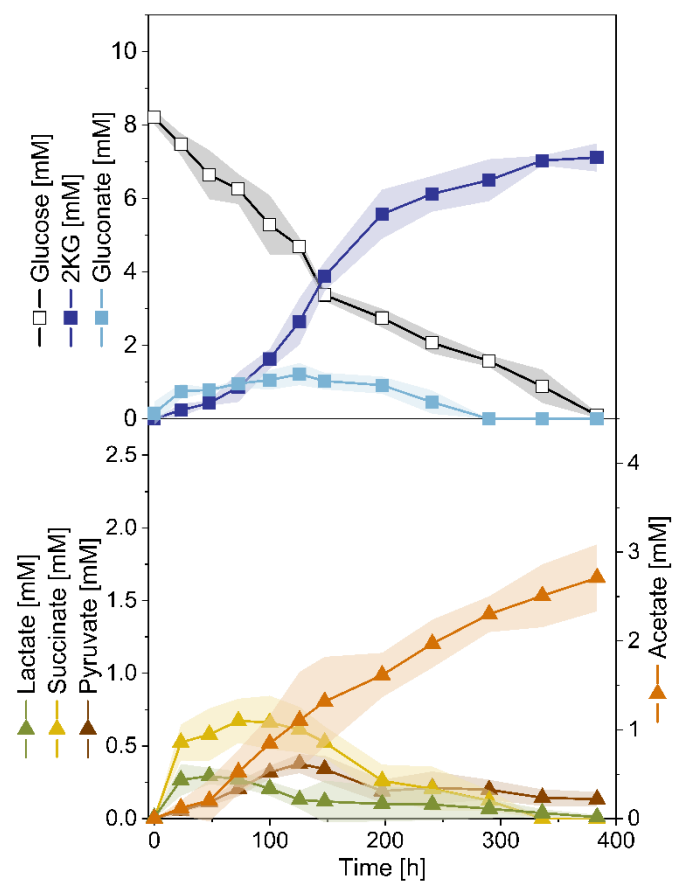

**Figure S1. BES cultivation of *P. putida* KT2440 (Fig. 1).** The displayed data were corrected for the evaporation of water.

**Table S1:** Mean values of measured data (uncorrected) and data corrected for the evaporation of water (corrected). (n=4).

| Time               | Glucose | 2-Ketogluconate | Gluconate | Acetate | Pyruvate | Succinate | Lactate |
|--------------------|---------|-----------------|-----------|---------|----------|-----------|---------|
| h                  | mM      | mM              | mM        | mM      | mM       | mM        | mM      |
| <b>Uncorrected</b> |         |                 |           |         |          |           |         |
| 0                  | 8.21    | 0.00            | 0.08      | 0.00    | 0.00     | 0.00      | 0.01    |
| 23.03              | 7.52    | 0.24            | 0.76      | 0.12    | 0.06     | 0.53      | 0.27    |
| 47.67              | 6.74    | 0.43            | 0.80      | 0.21    | 0.12     | 0.59      | 0.30    |
| 72.78              | 6.39    | 0.88            | 0.80      | 0.54    | 0.21     | 0.69      | 0.28    |
| 99.97              | 5.44    | 1.68            | 1.09      | 0.87    | 0.33     | 0.68      | 0.21    |
| 125.73             | 4.87    | 2.75            | 1.26      | 1.15    | 0.39     | 0.63      | 0.13    |
| 147.5              | 3.52    | 4.05            | 1.08      | 1.38    | 0.36     | 0.55      | 0.12    |
| 197.28             | 2.91    | 5.90            | 0.97      | 1.71    | 0.20     | 0.28      | 0.11    |
| 240.75             | 2.08    | 6.57            | 0.49      | 2.11    | 0.23     | 0.29      | 0.10    |
| 290.03             | 1.72    | 7.30            | 0.00      | 2.51    | 0.22     | 0.13      | 0.07    |
| 335.98             | 0.98    | 7.55            | 0.00      | 2.77    | 0.16     | 0.00      | 0.04    |
| 383.45             | 0.18    | 7.94            | 0.00      | 3.04    | 0.15     | 0.00      | 0.01    |
| <b>Corrected</b>   |         |                 |           |         |          |           |         |
| h                  | mM      | mM              | mM        | mM      | mM       | mM        | mM      |
| 0                  | 8.21    | 0.00            | 0.08      | 0.00    | 0.00     | 0.00      | 0.01    |
| 23.03              | 7.47    | 0.24            | 0.75      | 0.12    | 0.05     | 0.52      | 0.27    |
| 47.67              | 6.65    | 0.43            | 0.79      | 0.2     | 0.11     | 0.58      | 0.29    |
| 72.78              | 6.26    | 0.86            | 0.96      | 0.53    | 0.21     | 0.67      | 0.27    |
| 99.97              | 5.28    | 1.63            | 1.06      | 0.85    | 0.32     | 0.66      | 0.21    |
| 125.73             | 4.70    | 2.65            | 1.22      | 1.11    | 0.38     | 0.61      | 0.13    |
| 147.5              | 3.37    | 3.88            | 1.03      | 1.32    | 0.34     | 0.53      | 0.12    |
| 197.28             | 2.75    | 5.57            | 0.92      | 1.62    | 0.19     | 0.26      | 0.10    |
| 240.75             | 2.07    | 6.13            | 0.46      | 1.97    | 0.21     | 0.21      | 0.10    |
| 290.03             | 1.58    | 6.5             | 0.00      | 2.3     | 0.2      | 0.12      | 0.07    |
| 335.98             | 0.89    | 7.03            | 0.00      | 2.51    | 0.14     | 0.00      | 0.04    |
| 383.45             | 0.08    | 7.12            | 0.00      | 2.71    | 0.13     | 0.00      | 0.01    |
