# Supplementary material for: Systems biology of electrogenic Pseudomonas putida - multi-omics insights and metabolic engineering for enhanced 2-ketogluconate production
Source: PubMed Central journal article supplement (PMC11389600; doi:10.1186/s12934-024-02509-8), 2024-09-11
Supplement: 12934_2024_2509_MOESM2_ESM.pdf [file 12934_2024_2509_MOESM2_ESM.pdf]

**Additional file 2 to**

**Systems biology of electrogenic *Pseudomonas putida* - multi-omics insights and metabolic engineering for enhanced 2-ketogluconate production**

Anna Weimer<sup>1</sup>, Laura Pause<sup>2</sup>, Fabian Ries<sup>1</sup>, Michael Kohlstedt<sup>1</sup>, Lorenz Adrian<sup>3</sup>,  
Jens Krömer<sup>2</sup>, Bin Lai<sup>4</sup>, and Christoph Wittmann<sup>1#</sup>

<sup>1</sup> Institute of Systems Biotechnology, Saarland University, Saarbrücken, Germany

<sup>2</sup> Systems Biotechnology Group, Helmholtz Centre for Environmental Research - UFZ,  
Leipzig, Germany

<sup>3</sup> Department of Molecular Environmental Biotechnology, Helmholtz Centre for  
Environmental Research – UFZ, Leipzig, Germany

<sup>4</sup> BMBF Junior Research Group Biophotovoltaics, Helmholtz Centre for Environmental  
Research - UFZ, Leipzig, Germany

#Phone/FAX: +49 681 302 71970/71972, e-mail: [christoph.wittmann@uni-saarland.de](mailto:christoph.wittmann@uni-saarland.de)

**Table S1. List of primers used for genetic engineering.** The overhangs for Gibson assembly are underscored.

| Name           | Sequence (5' →3' )                                    | Application                                                |
|----------------|-------------------------------------------------------|------------------------------------------------------------|
| PP_5266_UP_fwd | <u>GAATTCGAGCTCGGTACCCGAAACCGAAGT</u><br>AATTACCAAGAC | Amplification of upstream region for deletion of PP_5266   |
| PP_5266_UP_rev | <u>TGCGAATGGCCGCAACCCTTGGGGCCTCCT</u><br>GAAACAT      | Amplification of upstream region for deletion of PP_5266   |
| PP_5266_DW_fwd | <u>CGGATGTTTCAGGAGGCCCAAGGGTTGCG</u><br>GCCATTGCG     | Amplification of downstream region for deletion of PP_5266 |
| PP_5266_DW_rev | <u>GTCGACTCTAGAGGATCCCCATTGCCCCAG</u><br>CGGTGATG     | Amplification of downstream region for deletion of PP_5266 |
| acsA-I_UP_fwd  | <u>GGTATTGCCGGGAAGGGTTACAGCCTTGCC</u><br>GACGAAA      | Amplification of upstream region for deletion of acsA-I    |
| acsA-I_UP_rev  | <u>TGAATTCGAGCTCGGTACCCCATCACGCGG</u><br>TATTCGAGA    | Amplification of upstream region for deletion of acsA-I    |
| acsA-I_DW_fwd  | <u>GTCGACTCTAGAGGATCCCCGTAACAGCT</u><br>GCCCGATATG    | Amplification of downstream region for deletion acsA-I     |
| acsA-I_DW_rev  | <u>TTCGTCGGCAAGGCTGTAACCCTTCCCGCA</u><br>ATACC        | Amplification of downstream region for deletion acsA-I     |
| acsA-II_UP_fwd | <u>GCCAGATTTGCGGCCGCCGGGGCGGGTGGT</u><br>CCTGCTCTT    | Amplification of upstream region for deletion of acsA-II   |
| acsA-II_UP_rev | <u>TGAATTCGAGCTCGGTACCCTGCGCGCTAAA</u><br>GGCCTCAAC   | Amplification of upstream region for deletion of acsA-II   |
| acsA-II_DW_fwd | <u>GTCGACTCTAGAGGATCCCCATTATCCGTA</u><br>GGACGAGCCG   | Amplification of downstream region for deletion acsA-II    |
| acsA-II_DW_rev | <u>CAAGAGCAGGACCACCCGCCCGGCGGCCG</u><br>CAAATCTG      | Amplification of downstream region for deletion acsA-II    |
| aldB-I_UP_fwd  | <u>GCGAAGAAGGCGACGCGGTGGTGTGTCTCC</u><br>TTGGTATTGT   | Amplification of upstream region for deletion of aldB-I    |
| aldB-I_UP_rev  | <u>TGAATTCGAGCTCGGTACCCTGGTGCAGG</u><br>CTGTTCATTT    | Amplification of upstream region for deletion of aldB-I    |
| aldB-I_DW_fwd  | <u>GTCGACTCTAGAGGATCCCCGACGACAGT</u><br>TCGGCCAGCG    | Amplification of downstream region for deletion aldB-I     |
| aldB-I_DW_rev  | <u>ACAATACCAAGGAGACACACCACCGCGTCG</u><br>CCTTCTTCG    | Amplification of downstream region for deletion aldB-I     |
| aldB-II_UP_fwd | <u>GGTATTGCCGGGAAGGGTTACAGCCTTGCC</u><br>GACGAAA      | Amplification of upstream region for deletion of aldB-II   |
| aldB-II_UP_rev | <u>TGAATTCGAGCTCGGTACCCCATCACGCGG</u><br>TATTCGAGA    | Amplification of upstream region for deletion of aldB-II   |
| aldB-II_DW_fwd | <u>GTCGACTCTAGAGGATCCCCGTAACAGCT</u><br>GCCCGATATG    | Amplification of downstream region for deletion aldB-II    |
| aldB-II_DW_rev | <u>TTCGTCGGCAAGGCTGTAACCCTTCCCGCA</u><br>ATACC        | Amplification of downstream region for deletion aldB-II    |
| scpC_UP_fwd    | <u>GTCGACTCTAGAGGATCCCCGTCCTGGCCT</u><br>TCATCATG     | Amplification of upstream region for deletion of scpC      |
| scpC_UP_rev    | <u>CGTTCGGTACCACATCCGGAGGATTGTTATC</u><br>TCGGGCTACTG | Amplification of upstream region for deletion of scpC      |
| scpC_DW_fwd    | <u>GTAGCCCGAGATAACAATCCTCCGGATGTG</u><br>GTACGGAACG   | Amplification of downstream region for deletion scpC       |
| scpC_DW_rev    | <u>CTGAATTCGAGCTCGGTACCCGAGCTCACGT</u><br>CGGATGTGG   | Amplification of downstream region for deletion scpC       |

**Table S2: Fatty acid composition of *P. putida* KT2440 at the start of the process (0 h) and after 100 h incubation in the bio-electrochemical system. The data are given in % of total fatty acids.**

| <b>Fatty acid</b>           | <b>0 h</b>  | <b>100 h</b> |
|-----------------------------|-------------|--------------|
| 10:0 3OH                    | 2.0         | 1.6          |
| 12:0                        | 4.4         | 6.2          |
| 12:0 2OH                    | 1.0         | 1.4          |
| 12:1 3OH w7c                | 0.2         | 0.1          |
| 12:0 3OH                    | 1.6         | 2.1          |
| 14:1 w7c                    | 0.2         | 0.1          |
| 14:1 w5c                    | -           | 0.1          |
| 14:0                        | 0.3         | 0.3          |
| 16:1 w7c                    | <b>30.6</b> | <b>7.0</b>   |
| 16:1 w7t                    | <b>2.3</b>  | <b>14.8</b>  |
| 16:0                        | 30.2        | 32.9         |
| 17:0 cyclo w7c              | 0.3         | 0.8          |
| 18:1 w7c                    | <b>25.7</b> | <b>12.6</b>  |
| 18:1 w7t                    | -           | <b>17.8</b>  |
| 18:1 w5c                    | 0.1         |              |
| 18:0                        | 1.1         | 2.1          |
| Sum n:0                     | 36.0        | 41.5         |
| Sum n:0 OH                  | 4.6         | 5.1          |
| Sum n:1 cis                 | <b>56.8</b> | <b>19.9</b>  |
| Sum n:0 cyclo               | 0.3         | 0.8          |
| Sum n:1 trans               | <b>2.3</b>  | <b>32.6</b>  |
| Degree of saturation        | 40.6        | 46.7         |
| Average carbon chain length | 16.1        | 16.2         |

**Table S3: Impact of anoxic-electrochemical conditions on the expression of genes related to central carbon metabolism in *P. putida* KT2440.** The data reflect significant differences between process start (0 h) and 24 h incubation in the bio-electrochemical system. n=3.

| Metabolic pathway                              | Gene name                | Locus tag  | log2FC  | adj. -value     |
|------------------------------------------------|--------------------------|------------|---------|-----------------|
| Glucose uptake                                 | <i>oprB-I</i>            | PP_1019    | -1.41   | <b>1.75E-01</b> |
|                                                | <i>oprB-II</i>           | PP_1445    | 0.86    | 4.45E-02        |
|                                                | <i>oprB-III</i>          | PP_3570    | 2.73    | 3.05E-05        |
|                                                | <i>gtsA</i>              | PP_1015    | -1.80   | 1.90E-02        |
|                                                | <i>gtsB</i>              | PP_1016    | -0.26   | 5.45E-02        |
|                                                | <i>gtsC</i>              | PP_1017    | -0.49   | <b>3.37E-01</b> |
|                                                | <i>gtsD</i>              | PP_1018    | -0.10   | <b>8.95E-01</b> |
|                                                | <i>glk</i>               | PP_1011    | 0.15    | <b>6.01E-01</b> |
| Gluconate / 2-Ketogluconate formation / uptake | <i>gcd</i>               | PP_1444    | -1.44   | 3.01E-03        |
|                                                | <i>gnl</i>               | PP_1170    | 1.88    | 1.65E-04        |
|                                                | <i>gadA / gdh</i>        | PP_3382    | 2.51    | 2.43E-04        |
|                                                | <i>gadB / gdh</i>        | PP_3383    | 1.87    | 1.86E-04        |
|                                                | <i>gadC / gdh</i>        | PP_3384    | 1.05    | 1.97E-04        |
|                                                | <i>gad / gdh</i>         | PP_3623    | -1.48   | 6.14E-03        |
|                                                | <i>gad / gdh</i>         | PP_4232    | 2.94    | 8.33E-06        |
|                                                | <i>gnuK</i>              | PP_3416    | -0.48   | <b>2.60E-01</b> |
|                                                | <i>gntT</i>              | PP_3417    | 0.19    | <b>5.56E-01</b> |
|                                                | <i>kguT</i>              | PP_3377    | 0.39    | <b>7.34E-02</b> |
|                                                | <i>kguK</i>              | PP_3378    | 1.39    | <b>2.43E-01</b> |
|                                                | Entner-Doudoroff pathway | <i>edd</i> | PP_1010 | 3.58            |
| <i>eda</i>                                     |                          | PP_1024    | -0.80   | <b>2.27E-01</b> |
| Pentose Phosphate pathway                      | <i>zwf-I</i>             | PP_1022    | -0.95   | <b>5.71E-02</b> |
|                                                | <i>zwf-II</i>            | PP_4042    | -0.77   | 4.60E-02        |
|                                                | <i>zwf</i>               | PP_5351    | 0.68    | 3.15E-02        |
|                                                | <i>pgl</i>               | PP_1023    | -0.81   | <b>1.46E-01</b> |
|                                                | <i>rpe</i>               | PP_0415    | 1.88    | 1.69E-03        |
|                                                | <i>gnd</i>               | PP_4043    | -0.39   | <b>3.28E-01</b> |
|                                                | <i>tktA</i>              | PP_4965    | 1.25    | 2.35E-03        |
|                                                |                          | PP_5367    | 1.10    | <b>2.42E-01</b> |
|                                                | <i>tal</i>               | PP_2168    | -1.30   | 5.20E-04        |
|                                                | <i>rpiA</i>              | PP_5150    | -0.08   | <b>1.43E-01</b> |
| Embden-Meyerhof-Parnas pathway                 | <i>pgi-1</i>             | PP_1808    | -0.51   | 2.67E-02        |
|                                                | <i>pgi-2</i>             | PP_4701    | -0.23   | <b>6.04E-01</b> |
|                                                | <i>fbp</i>               | PP_5040    | -0.73   | 1.61E-02        |
|                                                | <i>fda</i>               | PP_4960    | -0.36   | 3.39E-02        |

|                               |                      |              |         |                 |          |
|-------------------------------|----------------------|--------------|---------|-----------------|----------|
|                               |                      | PP_2037      | 3.97    | 2.08E-03        |          |
|                               |                      | PP_2871      | 3.20    | 4.09E-06        |          |
|                               |                      | PP_3224      | 4.32    | 7.65E-06        |          |
|                               | <i>tpiA</i>          | PP_4715      | -0.09   | 2.92E-02        |          |
|                               | <i>gap-I / gapA</i>  | PP_1009      | 1.62    | 1.81E-02        |          |
|                               | <i>gap-II / gapB</i> | PP_2149      | 0.92    | <b>3.13E-01</b> |          |
|                               |                      | PP_0665      | 3.29    | 2.89E-06        |          |
|                               |                      | PP_3443      | -0.90   | 2.52E-02        |          |
|                               | <i>pgk</i>           | PP_4963      | 0.88    | <b>1.59E-01</b> |          |
|                               | <i>pgm</i>           | PP_3578      | 0.46    | <b>2.40E-01</b> |          |
|                               |                      | PP_2243      | 3.19    | 2.44E-06        |          |
|                               |                      | PP_3923      | 1.58    | 3.56E-07        |          |
|                               |                      | PP_4450      | 0.01    | 3.89E-04        |          |
|                               | <i>pykA</i>          | PP_1362      | -0.87   | 4.10E-02        |          |
|                               | <i>pykF</i>          | PP_4301      | 4.01    | 1.14E-06        |          |
|                               | <i>ppsA</i>          | PP_2082      | -0.22   | <b>3.14E-01</b> |          |
|                               |                      | PP_2081      | -0.01   | 7.48E-03        |          |
| <b>Pyruvate dehydrogenase</b> | <i>acoA</i>          | PP_0555      | 2.98    | 1.78E-06        |          |
|                               | <i>acoB</i>          | PP_0554      | 4.01    | 2.75E-06        |          |
|                               | <i>acoC</i>          | PP_0553      | 3.52    | 7.83E-05        |          |
|                               | <i>aceF</i>          | PP_0338      | 3.29    | 4.42E-06        |          |
|                               | <i>aceE</i>          | PP_0339      | 1.15    | <b>2.55E-01</b> |          |
| <b>Citric acid cycle</b>      | <i>gltA</i>          | PP_4194      | 1.25    | 2.88E-02        |          |
|                               | <i>acnAI</i>         | PP_2112      | -0.18   | <b>1.89E-01</b> |          |
|                               | <i>acnB</i>          | PP_2339      | 0.74    | 5.31E-03        |          |
|                               | <i>acnAll</i>        | PP_2336      | 0.25    | 1.10E-02        |          |
|                               | <i>icd</i>           | PP_4011      | -2.55   | 1.09E-03        |          |
|                               | <i>idh</i>           | PP_4012      | 2.23    | 2.26E-02        |          |
|                               | <i>aceK</i>          | PP_4565      | 0.41    | 3.77E-03        |          |
|                               | <i>sdhA</i>          | PP_4191      | -0.18   | <b>7.92E-01</b> |          |
|                               | <i>sdhB</i>          | PP_4190      | -0.04   | <b>5.87E-01</b> |          |
|                               | <i>sdhD</i>          | PP_4192      | -0.85   | 1.09E-02        |          |
|                               | <i>sdhC</i>          | PP_4193      | -0.47   | 3.02E-02        |          |
|                               | <i>sucD</i>          | PP_4185      | -0.44   | <b>6.36E-01</b> |          |
|                               | <i>sucC</i>          | PP_4186      | -0.17   | <b>8.58E-01</b> |          |
|                               | <i>sucA</i>          | PP_4189      | 0.64    | <b>5.43E-01</b> |          |
|                               | <i>sucB</i>          | PP_4188      | 1.09    | <b>3.25E-01</b> |          |
|                               | <i>lpdG</i>          | PP_4187      | 1.07    | <b>3.37E-01</b> |          |
|                               | <i>fumC-I</i>        | PP_0944      | 3.43    | 1.86E-02        |          |
|                               | <i>fumC-II</i>       | PP_1755      | -1.33   | 2.85E-02        |          |
|                               |                      | PP_0897      | 2.28    | 1.51E-03        |          |
|                               |                      | PP_2652      | 0.38    | <b>9.11E-02</b> |          |
|                               |                      | <i>mdh</i>   | PP_0654 | -0.99           | 4.69E-03 |
|                               |                      | <i>mgo-I</i> | PP_0751 | 1.58            | 7.89E-03 |

|                                          |                 |         |       |                 |
|------------------------------------------|-----------------|---------|-------|-----------------|
|                                          | <i>mgo-II</i>   | PP_1251 | 2.84  | 4.64E-03        |
|                                          | <i>mgo-III</i>  | PP_2925 | -1.26 | 2.40E-03        |
|                                          |                 | PP_3591 | -0.59 | 2.79E-02        |
| <b>Glyoxylate shunt</b>                  | <i>aceA</i>     | PP_4116 | 3.15  | 6.84E-05        |
|                                          | <i>glcB</i>     | PP_0356 | 1.71  | 7.03E-03        |
| <b>Anaplerosis /<br/>Gluconeogenesis</b> | <i>ppc</i>      | PP_1505 | 1.78  | 1.31E-03        |
|                                          | <i>pycB</i>     | PP_5346 | 2.6   | 1.01E-03        |
|                                          | <i>pycA</i>     | PP_5347 | 2.47  | 8.18E-05        |
|                                          | <i>maeB</i>     | PP_5085 | 2.06  | <b>5.63E-01</b> |
| <b>Acetate formation</b>                 | <i>acsA-I</i>   | PP_4487 | 2.16  | 1.69E-02        |
|                                          | <i>acsA-II</i>  | PP_4702 | 0.91  | <b>2.03E-01</b> |
|                                          | <i>aldB-I</i>   | PP_0545 | 1.27  | <b>1.55E-01</b> |
|                                          | <i>aldB-II</i>  | PP_2680 | 2.81  | 1.08E-02        |
|                                          | <i>scpC</i>     | PP_0154 | 2.93  | 2.04E-05        |
|                                          |                 | PP_5266 | 2.26  | 7.53E-05        |
| <b>Lactate formation</b>                 | <i>lldD</i>     | PP_4736 | 2.22  | 1.37E-03        |
| <b>C4-dicarboxylate transport</b>        | <i>dctA-I</i>   | PP_1188 | 2.21  | 7.39E-04        |
|                                          | <i>dctA-II</i>  | PP_2056 | 2.00  | <b>6.76E-02</b> |
|                                          | <i>dctA-III</i> | PP_2255 | -0.85 | <b>1.82E-01</b> |
| <b>Acetate symport</b>                   | <i>actP-I</i>   | PP_1743 | 2.64  | 2.78E-03        |
|                                          | <i>actP-II</i>  | PP_2797 | 1.42  | 1.09E-02        |
|                                          | <i>actP-III</i> | PP_3272 | 4.06  | 5.27E-07        |

**Table S4: Impact of anoxic-electrochemical conditions on the expression of genes related to assembly of the flagellum in *P. putida* KT2440.** The data reflect differences between process start (0 h) and 24 h incubation in the bio-electrochemical system. Non-significant differences are shown in red (Benjamini-Hochberg FDR >0.05). n=3.

| Metabolic pathway  | Gene name   | Locus tag | log2FC   | Adj. p-value |
|--------------------|-------------|-----------|----------|--------------|
| Flagellar assembly | <i>fliE</i> | PP_4370   | -0.99    | 1.00E-02     |
|                    | <i>fliF</i> | PP_4369   | -0.01    | 2.55E-02     |
|                    | <i>fliG</i> | PP_4368   | -1.07    | 1.97E-03     |
|                    | <i>fliH</i> | PP_4367   | -0.09    | 0.20         |
|                    | <i>fliI</i> | PP_4366   | -0.76    | 0.22         |
|                    | <i>fliJ</i> | PP_4365   | 0.26     | 0.10         |
|                    | <i>fliK</i> | PP_4361   | -0.85    | 0.13         |
|                    | <i>fliL</i> | PP_4359   | -0.29    | 8.95E-05     |
|                    |             | PP_5209   | -1.95    | 7.54E-06     |
|                    | <i>fliM</i> | PP_4358   | -0.14    | 4.17E-03     |
|                    | <i>fliN</i> | PP_4357   | -0.01    | 1.74E-02     |
|                    | <i>fliO</i> | PP_4356   | 0.98     | 3.97E-03     |
|                    | <i>fliP</i> | PP_4355   | 0.76     | 0.19         |
|                    | <i>fliQ</i> | PP_4354   | 0.20     | 1.42E-02     |
|                    | <i>fliB</i> | PP_4352   | 1.71     | 6.77E-05     |
|                    | <i>flgA</i> | PP_4394   | -0.80    | 1.49E-02     |
|                    | <i>flgB</i> | PP_4391   | -2.41    | 5.41E-05     |
|                    | <i>flgC</i> | PP_4390   | -3.14    | 5.65E-05     |
|                    | <i>flgD</i> | PP_4389   | -2.78    | 4.26E-06     |
|                    | <i>flgE</i> | PP_4388   | -2.77    | 2.30E-05     |
|                    | <i>flgF</i> | PP_4386   | -1.75    | 7.05E-05     |
|                    | <i>flgG</i> | PP_4385   | -1.62    | 1.29E-04     |
|                    | <i>flgH</i> | PP_4384   | -2.02    | 3.21E-05     |
|                    | <i>flgI</i> | PP_4383   | -1.03    | 6.85E-03     |
|                    | <i>flgJ</i> | PP_4382   | -1.28    | 2.26E-03     |
|                    | <i>flgK</i> | PP_4381   | -1.10    | 0.17         |
|                    | <i>flgL</i> | PP_4380   | -2.04    | 2.21E-03     |
|                    |             | PP_1087   | -1.39    | 4.80E-03     |
|                    | <i>fliC</i> | PP_4378   | -1.60    | 9.61E-03     |
|                    | <i>fliD</i> | PP_4376   | -3.01    | 2.90E-06     |
| <i>fliS</i>        | PP_4375     | -2.74     | 3.68E-05 |              |
| <i>fliT</i>        | PP_4374     | -2.64     | 5.31E-06 |              |

|  |             |         |       |          |
|--|-------------|---------|-------|----------|
|  | <i>motA</i> | PP_4905 | -0.56 | 8.55E-02 |
|  |             | PP_4335 | -0.41 | 0.17     |
|  | <i>flgM</i> | PP_4395 | -1.40 | 2.41E-02 |
|  |             | PP_4396 | -1.40 | 0.10     |
|  | <i>fliY</i> | PP_0227 | -1.08 | 2.35E-02 |
|  |             | PP_5157 | 0.94  | 3.80E-03 |
|  | <i>fleQ</i> | PP_4373 | -0.66 | 6.62E-03 |
|  | <i>rpoN</i> | PP_0952 | -0.49 | 0.17     |
|  | <i>atoC</i> | PP_4371 | -0.09 | 0.15     |
|  | <i>fliA</i> | PP_4341 | -0.89 | 4.40E-02 |



**Table S5: Impact of anoxic-electrochemical conditions on the expression of genes and protein abundance, related to fatty acid metabolism in *P. putida* KT2440.** The data reflect differences between process start (0 h) and 24 h incubation in the bio-electrochemical system. Non-significant differences are shown in red (Benjamini-Hochberg FDR >0.05). n=3.

| Metabolic pathway            | Gene name      | Locus Tag | Log2FC - T1 Transcriptome | Log2FC - T1 Proteome |
|------------------------------|----------------|-----------|---------------------------|----------------------|
| Fatty acid de novo synthesis | <i>accA</i>    | PP_1607   | -1.59                     | 0.42                 |
|                              | <i>accB</i>    | PP_0559   | -1.84                     |                      |
|                              | <i>accC</i>    | PP_0558   | -0.73                     | 0.74                 |
|                              | <i>atoB</i>    | PP_3123   | -2.32                     |                      |
|                              | <i>fabB</i>    | PP_4175   | -0.38                     |                      |
|                              | <i>fabF</i>    | PP_1916   | 1.69                      | 0.8                  |
|                              | <i>fabD</i>    | PP_1913   | 0.1                       | -2.05                |
|                              | <i>fabG</i>    | PP_1914   | -0.94                     |                      |
|                              | <i>fabZ</i>    | PP_1602   | 0.16                      | 1.1                  |
|                              | <i>fabA</i>    | PP_4174   | -1.06                     |                      |
|                              | <i>aacS</i>    | PP_3071   | 0.52                      |                      |
|                              | <i>acpP</i>    | PP_1915   | -0.45                     | -2.59                |
| <i>fabH</i>                  | PP_4379        | -0.46     |                           |                      |
| β-oxidation                  | <i>fadA</i>    | PP_2051   | 2.30                      |                      |
|                              | <i>fadB</i>    | PP_2136   | 1.31                      |                      |
|                              | <i>fadBA</i>   | PP_2214   | -0.81                     |                      |
|                              | <i>fadE</i>    | PP_1893   | -0.53                     |                      |
|                              | <i>fadD-I</i>  | PP_4549   | 0.65                      |                      |
|                              | <i>fadD-II</i> | PP_4550   | -0.40                     |                      |
|                              | <i>yqeF</i>    | PP_4636   | -1.15                     |                      |
|                              | <i>acd</i>     | PP_2216   | -1.89                     |                      |
|                              | <i>paaF</i>    | PP_3284   | 4.38                      |                      |
|                              | <i>paaH</i>    | PP_3282   | 4.43                      | -0.37                |
|                              | <i>pcaF-I</i>  | PP_1377   | 4.46                      |                      |
|                              | <i>pcaF-II</i> | PP_2137   | 0.91                      |                      |
| <i>bktB</i>                  | PP_3754        | -0.23     |                           |                      |
| Methylcitrate cycle          | <i>mmgF</i>    | PP_2334   | -2.04                     |                      |
|                              | <i>prpC</i>    | PP_2335   | -1.47                     |                      |
|                              | <i>acnA-II</i> | PP_2336   | 0.25                      |                      |
|                              | <i>prpF</i>    | PP_2337   | 0.44                      |                      |
|                              | <i>prpD</i>    | PP_2338   | 0.37                      |                      |
|                              | <i>cti</i>     | PP_2376   | 2.15                      |                      |

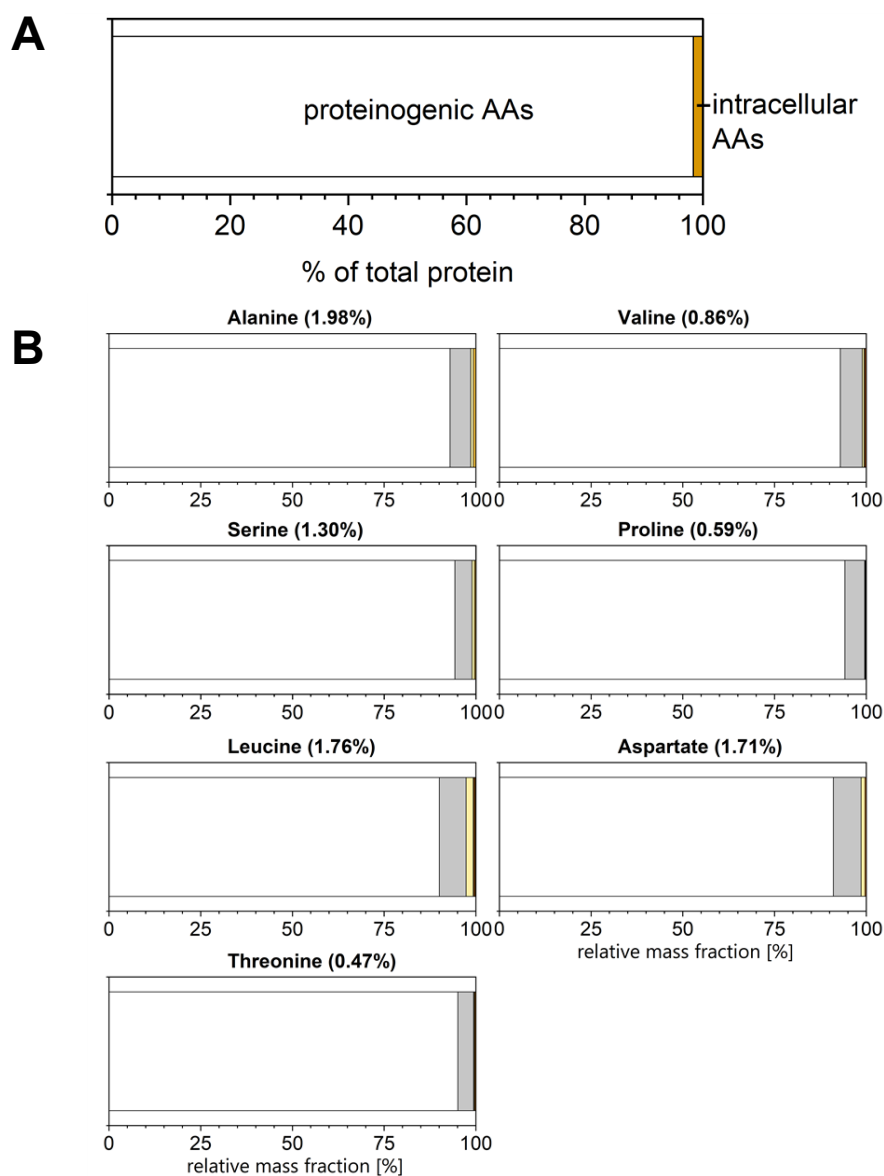

**Figure S1: Summed fraction labelling (SFL) of amino acids derived from hydrolyzed *P. putida* KT2440 cells after 100 h incubation on [ $^{13}\text{C}_6$ ] glucose in the bio-electrochemical system. Share of protein-bound (98.4%) and free intracellular amino acids (1.6%) (A). The calculation was based on a cellular protein content of  $0.553 \text{ g g}^{-1}$  [1] and intracellular amino acid levels in *P. putida* [2]. The SFL data of selected proteinogenic amino acids are given below (B).**

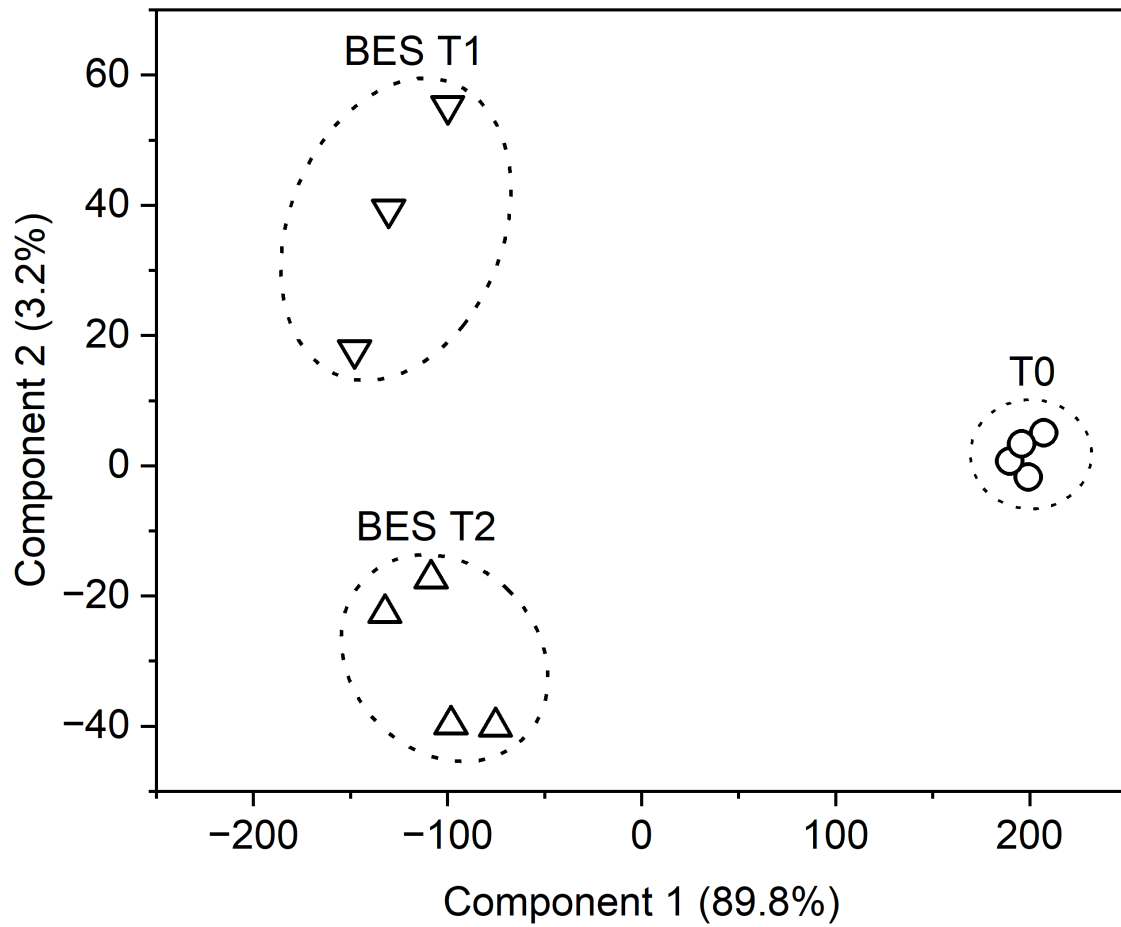

**Figure S2: Principal component analysis of the obtained transcriptome data.** T0 (preculture; circle), T1 (BES 24 h; down-pointing triangle), T2 (BES 100 h; up-pointing triangle).

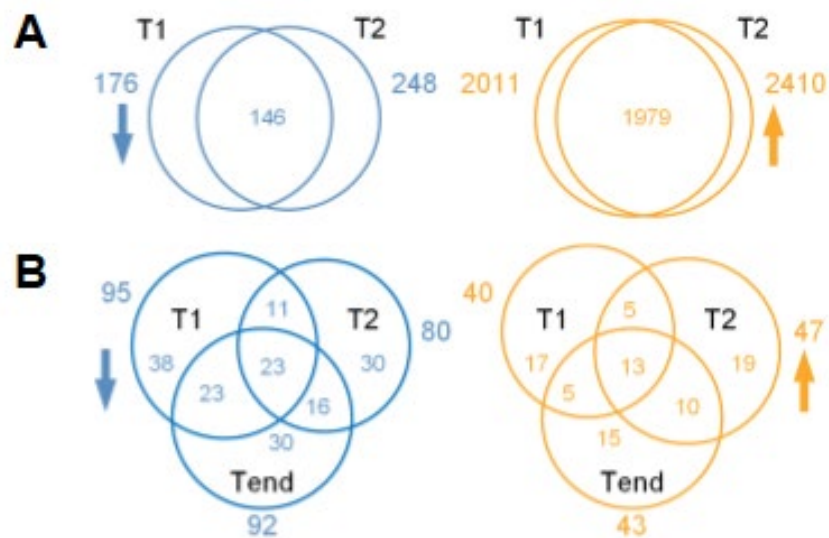

**Figure S3: Venn diagram of proteome and transcriptome data at different time points.** Significantly down- (blue) and upregulated (yellow) genes at T1 (24 h) and T2 (100h) compared to T0 (pre-culture) (A). Significantly lower (blue) and higher (yellow) abundant proteins at T1 (24 h), T2 (100h) and Tend (380h) compared to T0 (pre-culture).

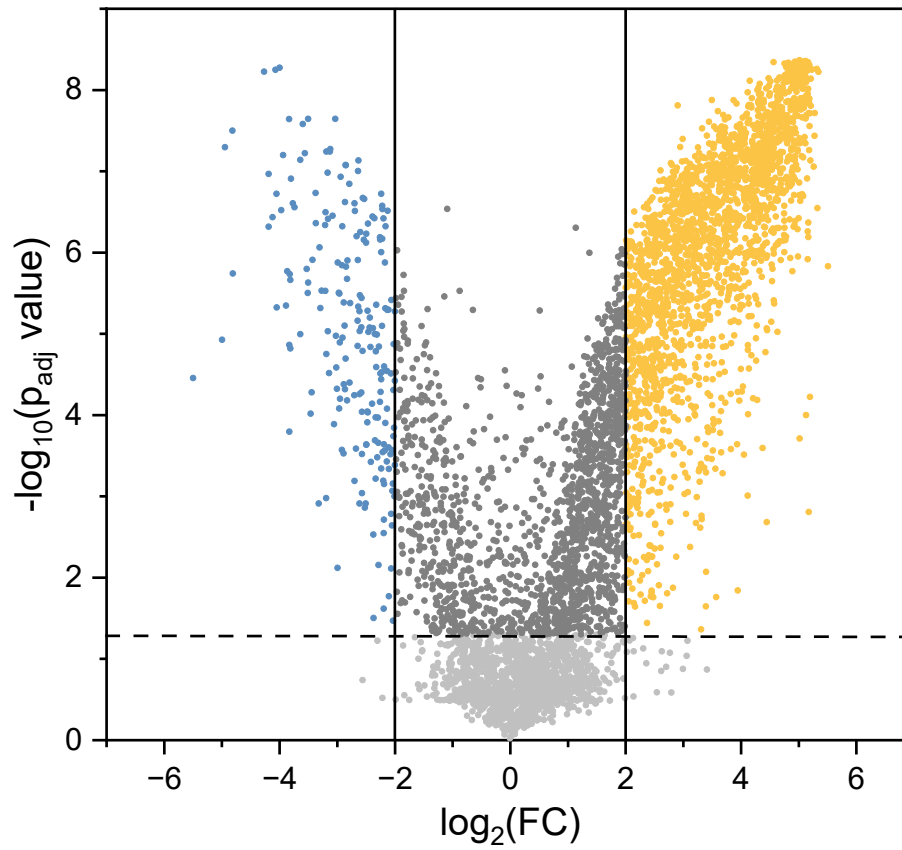

**Figure S4: Volcano plot T2 vs T0.** Significantly down- ( $\text{Log}_2(\text{FC}) < -2$ ,  $\text{p}_{\text{adj}} < 0.05$ ; blue) and upregulated ( $\text{Log}_2(\text{FC}) > 2$ ,  $\text{p}_{\text{adj}} < 0.05$ ; yellow) genes at T2 (100 h) compared to T0 (0 h).

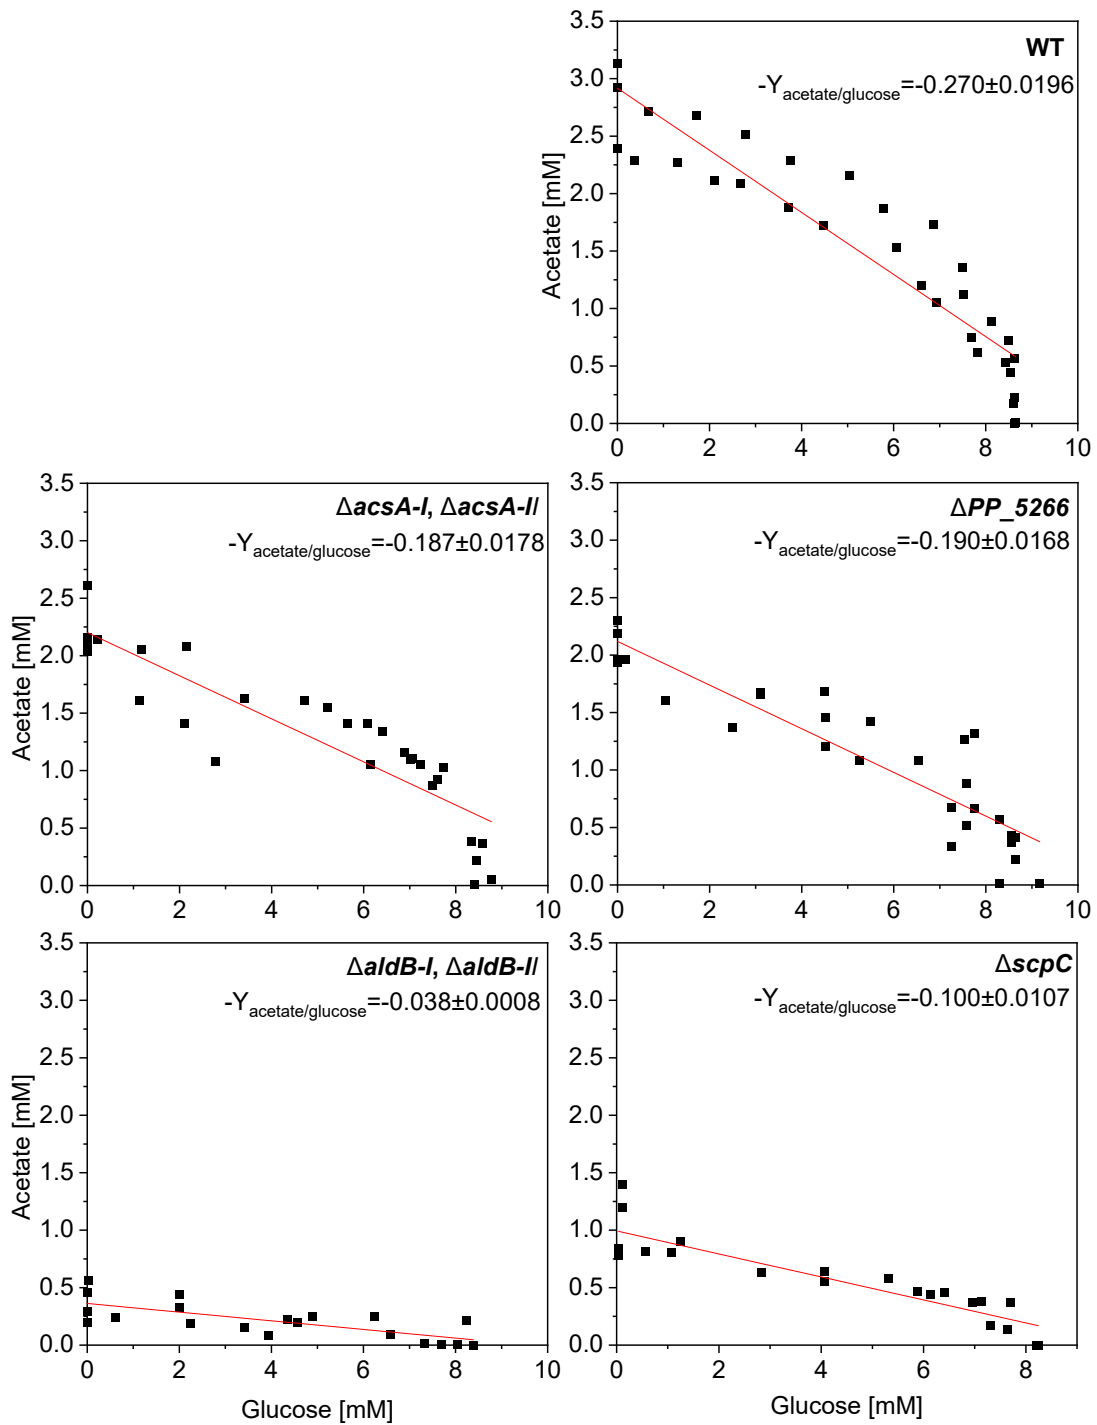

**Figure S5:** Regression analysis for the determination of acetate/glucose yield coefficients for the wild type *P. putida* KT2440 (WT) as well as the mutants  $\Delta\text{acsA-I}$ ,  $\Delta\text{acsA II}$ ,  $\Delta\text{PP5266}$ ,  $\Delta\text{aldB-I}$ ,  $\Delta\text{aldB-II}$ , and  $\Delta\text{scpC}$  in BES.

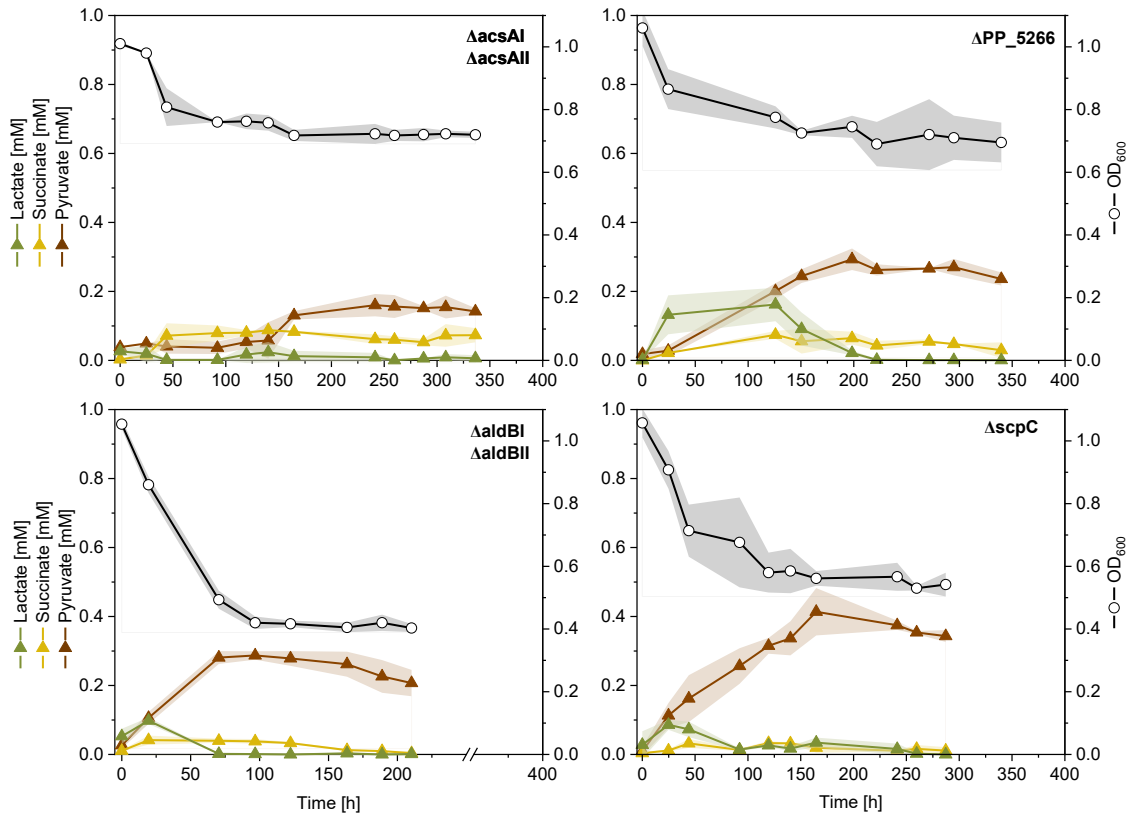

**Figure S6: Additional data related to the BES processes of different acetate mutants shown in Fig. 8.** The data comprise the profiles of lactate, succinate, and pyruvate over time (mM), as well as the cell concentration (OD<sub>600</sub>) over time.

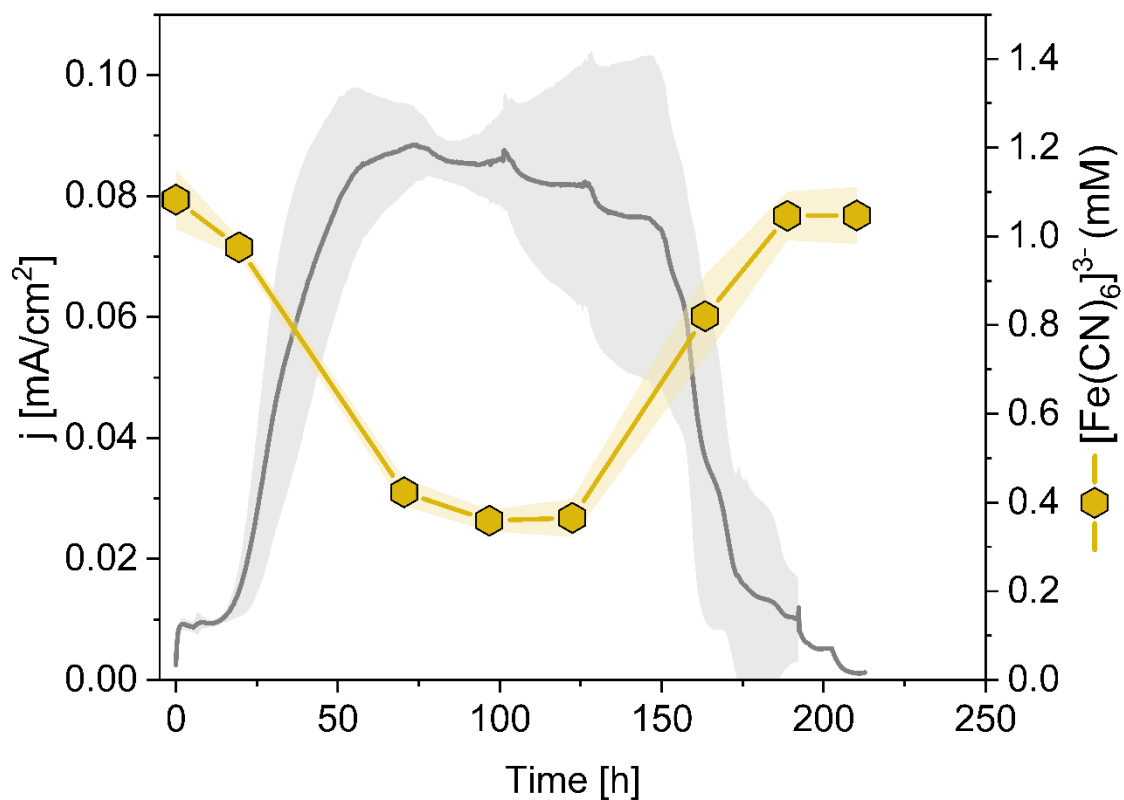

**Figure S7: Additional data related to the BES process of *P. putida*  $\Delta aldBI$   $\Delta aldBII$ .** The data comprise the current density  $j$  [mA/cm<sup>2</sup>], and the concentration of [Fe(CN)<sub>6</sub>]<sup>3-</sup> over time.



## Literature

1. van Duuren JB, Puchalka J, Mars AE, Bucker R, Eggink G, Wittmann C, Dos Santos VA: **Reconciling *in vivo* and *in silico* key biological parameters of *Pseudomonas putida* KT2440 during growth on glucose under carbon-limited condition.** *BMC Biotechnol* 2013, **13**:93.
2. Bolten CJ, Kiefer P, Letisse F, Portais JC, Wittmann C: **Sampling for metabolome analysis of microorganisms.** *Anal Chem* 2007, **79**:3843-3849.
